# Supplementary material
Source: PubMed Central journal article supplement (PMC4233198)

## SUPPORTING INFORMATION

Supporting information contains one table and one figure.

Figure Legend:

Figure S1. Enzyme classes of **A**: the total drug target set (453) and **B**: those with phosphorylation within 12Å (132).

Table S1. All targets with endogenous cell MS evidence of phosphorylation near drug binding site. Entries in order of stage of development.

| Target Protein                                                  | Uniprot Sequence ID | Stage of Drug Development | PDB ID | PDB Ligand ID | Phosphorylated Residue(s) | Distance (Å) |
|-----------------------------------------------------------------|---------------------|---------------------------|--------|---------------|---------------------------|--------------|
| GTPase KRas (K-Ras)                                             | P01113              | Preclinical               | 4LUC   | 20G           | Tyr64                     | 6.8          |
| p21-activated kinase 6 (PAK6)                                   | Q9NQU5              | Preclinical               | 4KS7   | X4Z           | Thr564                    | 8.9          |
| Serine/threonine-protein kinase PRP4 homolog (PRPF4B)           | Q13523              | Preclinical               | 4IJP   | 1EH           | Ser837                    | 9.6          |
| Epidermal fatty acid-binding protein (FABP5)                    | Q01469              | Preclinical               | 4AZM   | T4B           | Tyr131                    | 2.7          |
| Beta-Secretase 2 (BACE2)                                        | Q9Y5Z0              | Preclinical               | 3ZKQ   | B3P           | Tyr93                     | 3.4          |
| Tank-binding kinase 1 (TBK1)                                    | Q9UHD2              | Preclinical               | 4IM0   | 1FV           | Tyr153                    | 11.4         |
| Cyclin-dependent kinase-like 3 (CDKL3)                          | Q8IVW4              | Preclinical               | 3ZDU   | 38R           | Tyr160                    | 8.6          |
| Ribosomal protein S6 kinase alpha-3 (Rsk2)                      | P51812              | Preclinical               | 3UBD   | SL0           | Thr231                    | 10.3         |
| Mitogen-activated protein kinase 14 (MAPK14)                    | Q16539              | Preclinical               | 3ZS5   | SB2           | Thr185                    | 12.0         |
| Serine hydroxymethyltransferase (Shmt1)                         | P34896              | Preclinical               | 1EJI   | THF           | Tyr73                     | 6.5          |
| Glutathione reductase (GSR)                                     | P00390              | Preclinical               | 1XAN   | HXP           | Tyr451                    | 3.5          |
| Triosephosphate isomerase (TPI)                                 | P60174              | Preclinical               | 1HTI   | PGA           | S249                      | 3.7          |
| Phosphatidylinositol-3,4,5-triphosphate 5-phosphatase 2 (SHIP2) | O15357              | Preclinical               | 4A9C   | B5F           | Tyr661                    | 2.8          |
| 17beta-hydroxysteroid dehydrogenase type 10 (HSD10/ABAD)        | Q99714              | Preclinical               | 1U7T   | TDT           | Ser45                     | 3.9          |
| Protein tyrosine kinase 2 beta (PYK2)                           | Q14289              | Preclinical               | 3FZS   | B96           | Tyr440                    | 6.7          |
| Spermine synthase (SMS)                                         | P52788              | Preclinical               | 3C6M   | MTA           | Tyr147                    | 6.1          |
| Creatine kinase B-type (CKB)                                    | P12277              | Preclinical               | 3B6R   | CRN           | Ser285                    | 3.2          |
| Ephrin type-A receptor 4 (EPHA4)                                | P54764              | Preclinical               | 2Y6O   | 1N1           | Thr692                    | 2.9          |

|                                                                     |        |             |      |     |         |      |
|---------------------------------------------------------------------|--------|-------------|------|-----|---------|------|
| Glycogen synthase kinase-3 beta (GSK3 $\beta$ )                     | P49841 | Preclinical | 4AFJ | SJJ | Ser219  | 10.5 |
| Tankyrase-1 (TNKS1)                                                 | 095271 | Preclinical | 3UDD | 34M | Tyr1292 | 7.4  |
| Serine/threonine protein kinase Tao2 (TAO2)                         | Q9UL54 | Preclinical | 2GCD | STU | Tyr43   | 7.6  |
| Hematopoietic cell kinase (HCK)                                     | P08631 | Preclinical | 2HK5 | 1BM | Tyr330  | 7.0  |
| Receptor-type tyrosine-protein phosphatase gamma (PTPG)             | P23470 | Preclinical | 3QCG | NX1 | Tyr1021 | 7.4  |
| Calcium/calmodulin dependent protein kinase II alpha (CAMK2A)       | Q9UQM7 | Preclinical | 3SOA | DB8 | Ser25   | 6.3  |
| Monoglyceride lipase (MAGL)                                         | Q99685 | Preclinical | 3PE6 | ZYH | Thr189  | 5.9  |
| Heat shock cognate 71 kDa protein (HSPA8)                           | P11142 | Preclinical | 3LDQ | 3P1 | Tyr15   | 5.6  |
| Activin receptor type-1 (ACVR1/ALK2)                                | Q04771 | Preclinical | 3OOM | 507 | Ser226  | 12.0 |
| Calcium/calmodulin dependent protein kinase kinase II beta (CaMKK2) | Q96RR4 | Preclinical | 2ZV2 | 609 | Tyr190  | 8.4  |
| Aldo-keto reductase family 1 member C1 (AKR1C1)                     | Q04828 | Preclinical | 3C3U | C2U | Tyr24   | 3.8  |
| Ephrin type-A receptor 3 (EphA3)                                    | P29320 | Preclinical | 3DZQ | IFC | Tyr742  | 3.7  |
| Ephrin type-A receptor 7 (EphA7)                                    | Q15375 | Preclinical | 3DKO | IHZ | Tyr609  | 7.4  |
| CDC-like kinase 1 (CLK1)                                            | P49579 | Preclinical | 2VAG | V25 | Ser341  | 12.0 |
| Rac-beta serine/threonine protein kinase (Akt2)                     | P31751 | Preclinical | 2JDO | I5S | Thr313  | 8.1  |
| Aldo-keto reductase family 1 member C3 (AKR1C3)                     | P42330 | Preclinical | 1ZQ5 | E04 | Tyr55   | 7.5  |
| Rho-associated protein kinase 2 (ROCK2)                             | O75116 | Phase I     | 2F2U | M77 | Thr253  | 10.5 |
| Arginase 1 (Arg1)                                                   | P05081 | Phase I     | 2AEB | ABH | Ser230  | 9.3  |
| Galectin-1 (LGALS1)                                                 | P09382 | Phase I     | 3T2T | MQT | Ser30   | 4.4  |
| Interleukin-1 associated receptor kinase 4 (IRAK4)                  | Q9NWZ3 | Phase I     | 2NRU | T12 | Thr209  | 7.4  |
| Nicotinamide phosphoribosyltransferase (NAMPT)                      | P43490 | Phase II    | 4LVF | 20P | Tyr188  | 8.5  |
| NT-3 growth factor receptor (TRKC)                                  | Q16288 | Phase II    | 3V5Q | 0F4 | Tyr705  | 9.5  |

|                                                           |        |           |      |     |         |      |
|-----------------------------------------------------------|--------|-----------|------|-----|---------|------|
| Protein kinase C alpha (PKC $\alpha$ )                    | P17252 | Phase II  | 3IW4 | LW4 | Thr501  | 10.1 |
| Aurora A kinase (AURKA)                                   | O14965 | Phase II  | 3DJ6 | AK6 | Tyr148  | 6.8  |
| Matrix metalloproteinase 2 (MMP2)                         | P08253 | Phase II  | 1HOV | I52 | Ser160  | 11.1 |
| Protein kinase c beta II (PKCB)                           | P05771 | Phase II  | 2I0E | PDS | Thr504  | 9.1  |
| Aldo-keto reductase family 1 member B10 (AKR1B10)         | O60218 | Phase III | 1ZUA | TOL | Ser23   | 10.0 |
| Proto-oncogene tyrosine-protein kinase receptor Ret (RET) | P07949 | Approved  | 2IVS | ACK | Tyr752  | 12.0 |
| Vascular endothelial growth factor receptor 1 (VEGFR1)    | P17948 | Approved  | 3HNG | 8ST | Tyr1053 | 11.9 |
| Aldehyde dehydrogenase (ALDH3)                            | P30838 | Approved  | 3SZB | I1E | Tyr186  | 9.0  |
| Serine/threonine protein kinase MRCK beta (MRCK $\beta$ ) | Q9Y5S2 | Approved  | 3TKU | M77 | Ser363  | 11.6 |
| Aldose reductase (ALDR1)                                  | P15121 | Approved  | 1US0 | LDT | Tyr49   | 2.7  |
| Adenosine deaminase (ADA1)                                | P00813 | Approved  | 1NDY | FR3 | Tyr67   | 12.0 |
| Epidermal growth factor receptor (EGFR/HER1)              | P00533 | Approved  | 4G5J | 0WN | Tyr764  | 9.6  |
| Receptor tyrosine-protein kinase erbB4 (ERBB4/HER4)       | Q15303 | Approved  | 2R4B | GW7 | Tyr733  | 6.7  |
| Tubulin alpha 3C/D chain (TUBA3C)                         | Q13748 | Approved  | 4EB6 | VLB | Tyr210  | 3.1  |
| Peptidyl-prolyl cis-trans isomerase FKBP5 (FKBP5)         | Q13451 | Approved  | 4DRI | RAP | Tyr54   | 10.3 |
| Vascular endothelial growth factor receptor 2 (VEGFR2)    | P35968 | Approved  | 4AGD | B49 | Tyr1053 | 10.7 |
| Inosine-5-monophosphate dehydrogenase 2 (IMPDH2)          | P12268 | Approved  | 1JR1 | MOA | Tyr411  | 2.8  |
| Tubulin alpha-1A chain (TUBA1A)                           | Q71U36 | Approved  | 1SA1 | POD | Thr73   | 12.0 |
| Anaplastic lymphoma kinase (ALK)                          | Q9UM73 | Approved  | 3AOX | EMH | Tyr1131 | 6.3  |
| Tyrosine protein kinase lyn (LYN)                         | P07948 | Approved  | 2ZVA | 1N1 | Tyr265  | 11.8 |
| Carbonic Anhydrase II (CA2)                               | P00918 | Approved  | 3K34 | SUA | Tyr51   | 12.0 |
| Protein S100-A13 (S100A13)                                | Q99584 | Approved  | 2KOT | ANW | Ser32   | 7.6  |

FIGURE S1

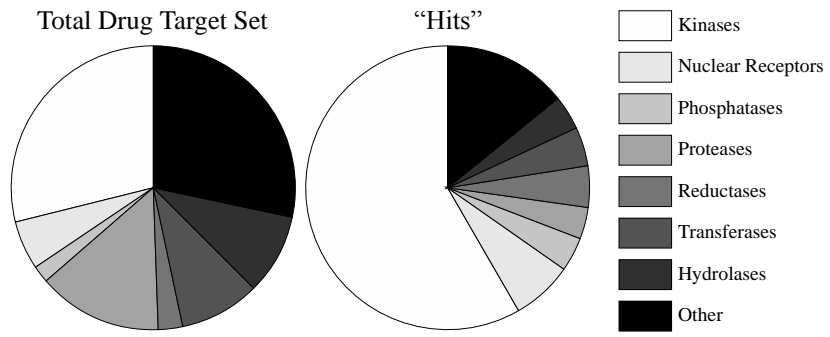

Supplement: NIHMS595555-supplement-Supp_Material.pdf [file NIHMS595555-supplement-Supp_Material.pdf]
